# Supplementary material for: Outcomes of COVID-19 among Patients with Chronic Liver Disease: A Danish Prospective, Population-Based Cohort Study
Source: Hindawi journal article supplement (doi:10.1155/2022/8081932), 2022-07-12
Supplement: f1 [file 8081932.f1.pdf]

## Outcomes of COVID-19 among patients with chronic liver disease – Supplementary tables

**Supplementary table 1: International Classification of Diseases (Tenth Revision) codes for CLD**

| Disease                           | ICD 10                                        |
|-----------------------------------|-----------------------------------------------|
| Alcoholic liver disease           | DK70.0                                        |
| Liver cirrhosis                   | DK70.3, DK70.3A, DK74.3, DK74.6, DK74.6B-E    |
| Alcoholic liver insufficiency     | DK70.4, DK70.4B-D                             |
| Hepatocellular carcinoma          | DC22.0                                        |
| Non-alcoholic fatty liver disease | DK76.0A-C                                     |
| Primary biliary cholangitis       | DK74.3                                        |
| Chronic liver insufficiency       | DK72.1                                        |
| Non-specified liver cirrhosis     | DK746, DK746B-F                               |
| Hepatitis A                       | DB15.0, DB15.9                                |
| Hepatitis B                       | DB16, DB16.1, DB16.2, DB16.9A, DB18.0, DB18.1 |
| Hepatitis C                       | DB17.1, DB18.2                                |
| Autoimmune hepatitis              | DK73.2B-G                                     |
| Primary sclerosing cholangitis    | DK830F                                        |
| Hemochromatosis                   | DE83.1A                                       |
| Alpha-1 antitrypsin deficiency    | DE88.0A                                       |
| Hepatorenal syndrome              | DK76.7                                        |
| Wilson's disease                  | DE83.0B                                       |
| Budd-Chiari's syndrome            | DI820                                         |

**Supplementary table 2: Impact of COVID-19 on biochemical Characteristics of cirrhosis and other chronic liver disease**

| Variables                     | Cirrhosis      |                 |                | Non cirrhosis  |                |                |
|-------------------------------|----------------|-----------------|----------------|----------------|----------------|----------------|
|                               | Prior COVID-19 | *After COVID-19 | <i>p value</i> | Prior COVID-19 | After COVID-19 | <i>p value</i> |
| Biochemistry in Plasma (mean) |                |                 |                |                |                |                |
| Albumin (g/dl)                | 20.2           | 20.9            | 0.8            | 30.3           | 33.3           | <b>0.02</b>    |
| Bilirubin (umol/L)            | 75             | 31.7            | 0.3            | 25.8           | 15.7           | 0.5            |
| INR                           | 1.4            | 1.4             | 0.5            | 1.1            | 1.1            | 0.4            |
| Creatinine (umol/L)           | 62.8           | 57.3            | 0.4            | 115.1          | 91.6           | 0.2            |

\*First blood sample among 1-3 months after confirmed test of COVID or discharge from hospital.
